# Supplementary material for: Different Roles of N-Terminal and C-Terminal Domains in Calmodulin for Activation of Bacillus anthracis Edema Factor
Source: MDPI journal article supplement (doi:10.3390/toxins7072598), 2015-07-13
Supplement: s1 [file s1]

## Supplementary Information

Different roles of *N*-terminal and C-terminal domains in calmodulin for activation of *Bacillus anthracis* edema factor.

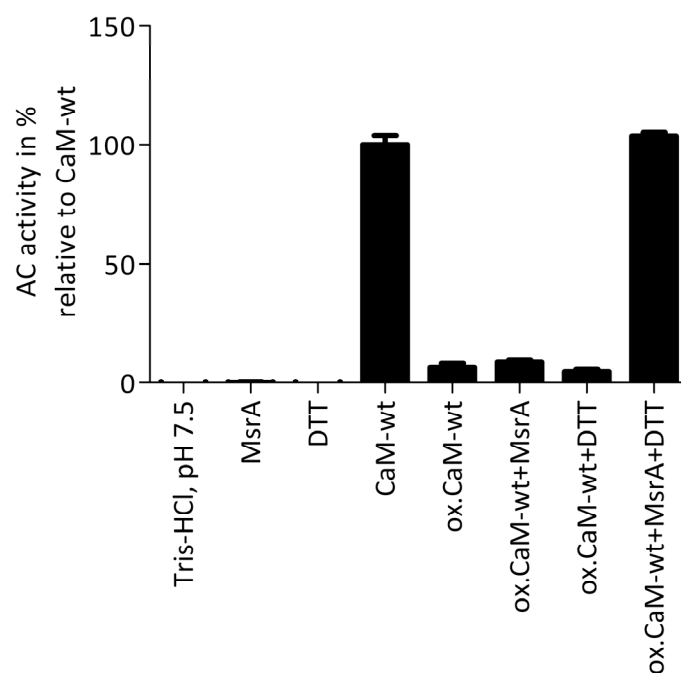

**Figure S1.** Restoration of AC activity of EF by MsrA-treated oxidized CaM-wt. Reactions contained a final concentration of 10  $\mu$ M native CaM-wt or oxidized CaM-wt, 0.67  $\mu$ M MsrA and 2 mM DTT. Treatment of oxidized CaM-wt with 10 mM DTT and/or 4  $\mu$ M MsrA for 1 h at 37  $^{\circ}$ C was performed as described in the “Experimental Section”. The AC activities show the means  $\pm$  SD of one experiment performed in triplicates.

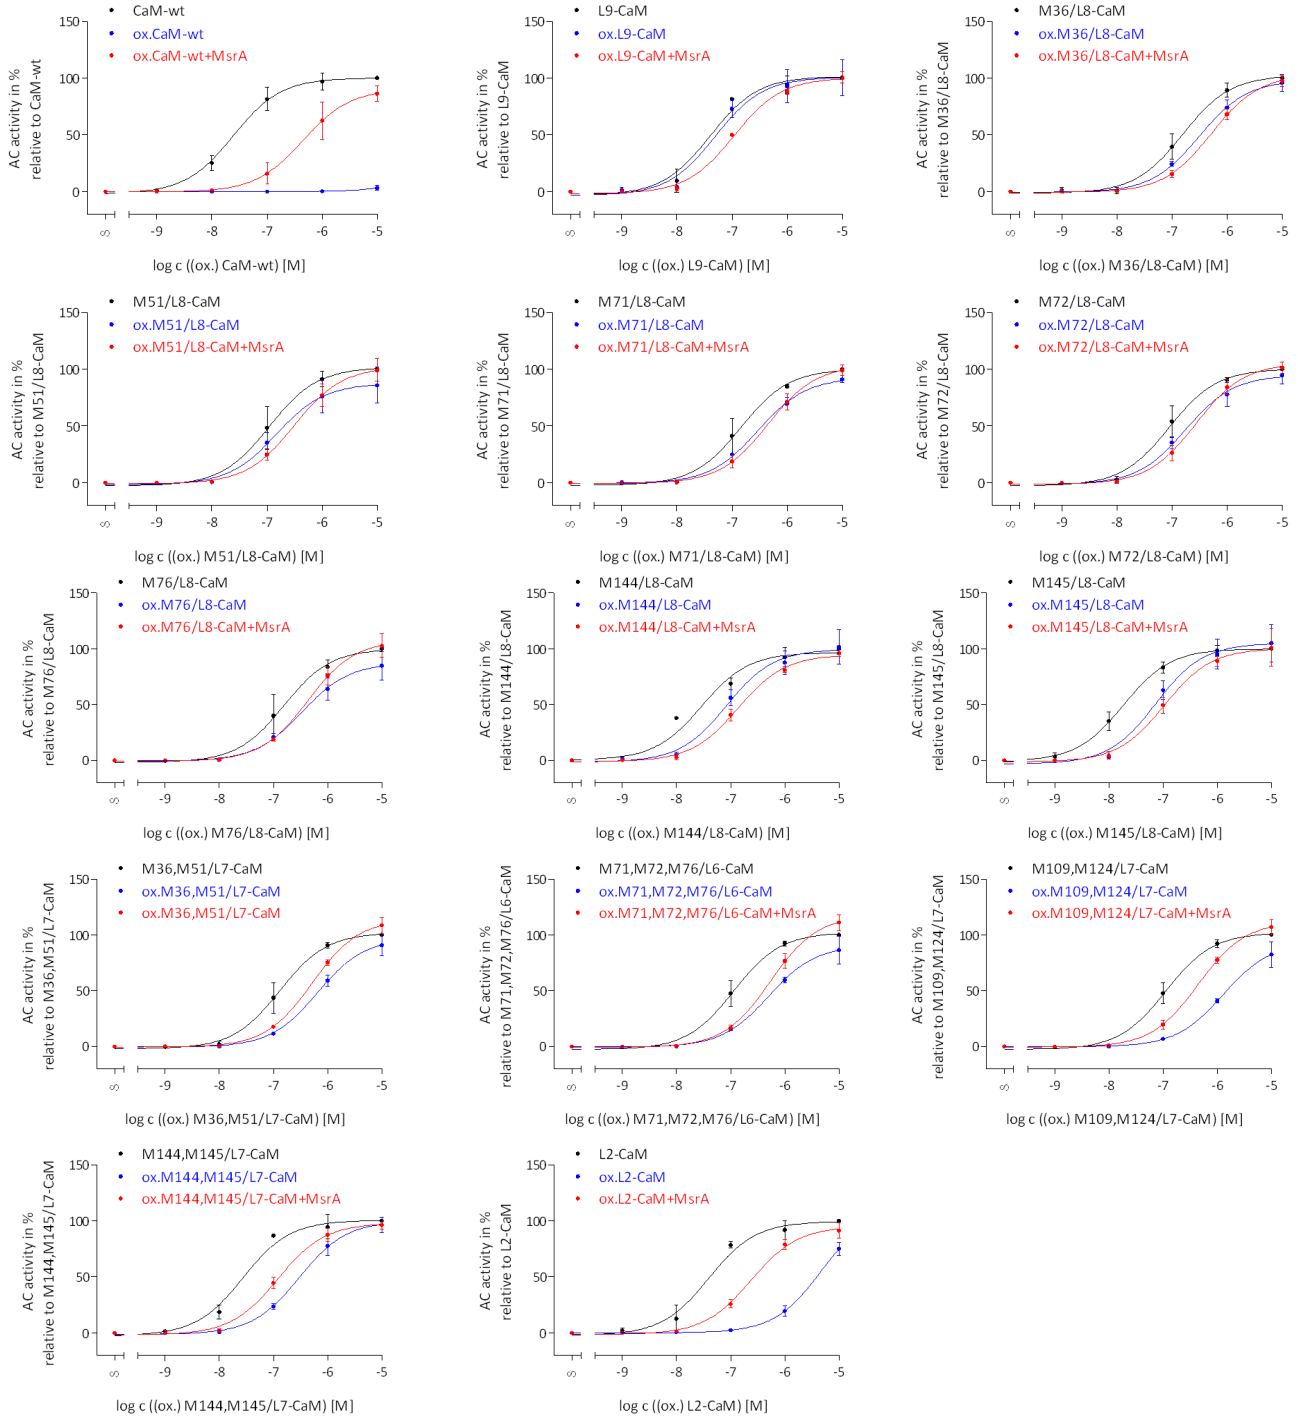

**Figure S2.** Concentration-response curves for the stimulation of EF by native, oxidized and MsrA-treated oxidized CaM-wt and CaM-mut. Met oxidation using 50 mM H<sub>2</sub>O<sub>2</sub> and 0.1 mM CaCl<sub>2</sub> for 24 h at 25 °C, the treatment of oxidized CaM-wt or CaM-mut with MsrA and the AC activity assay were performed as described in the “Experimental Section”. Concentrations of native (**black**), oxidized (**blue**) and MsrA-treated oxidized (**red**) CaM-wt/CaM-mut varied from 1 nM to 10 μM. Concentration-response curves were analyzed by nonlinear regression (three parameters) using GraphPad Prism 5.04. The AC activity of EF with 30 mM Tris-HCl, pH 7.5 was set to 0% and with 10 μM native CaM-wt or each native CaM-mut to 100%. The AC activities show the means ± SD of three independent experiments performed in duplicates.
